# Supplementary material
Source: publisher site journal article supplement (https://www.dovepress.com/article/358015)
Supplement: Supplementary file 1 [file get_supplementary_file.php]

**Supplementary material**

**Evaluation of the therapeutic pattern and pharmaco-utilization in hypercholesterolemic patients treated with statins: a retrospective study on Italian real-world data**

Valentina Perrone, Elisa Giacomini, Diego Sangiorgi, Margherita Andretta, Fausto Bartolini, Alessandro Lupi, Fulvio Ferrante, Stefano Palcic, Davide Re, Luca Degli Esposti

**Supplementary Table 1. List of approved protocols by Ethics Committees**

| **Ethics Committee** | **Approved Protocol number** |
| --- | --- |
| Comitato Etico per la sperimentazione clinica delle province di Verona e Rovigo | Prot n 64198 of 3/10/2018 |
| Comitato Etico Unico Regionale FVG | Prot. n 2578 of 5/2/2019 |
| Comitato Etico Interaziendale AOU “Maggiore della Carità” – ASL BI-ASL NO-ASL VCO | Prot n 364/CE of 12/4/2019 |
| Ceas UMBRIA | Prot n 14657/18/ON of 25/10/2018 |
| Comitato Etico Lazio 2 | Prot. N 0199138/2018 of 5/12/2018 |
| Comitato Etico Regione Abruzzo – ASL Avezzano- Sulmona-L’Aquila | Prot. n 8 of 16/5/2019 |

**Supplementary Table 2**. **Definition criteria for Familial hypercholesterolemia (Dutch Lipid Clinic Network, DLCN)**

| Criteria | Score assignment |
| --- | --- |
| Family history | First-degree relatives with premature coronary and vascular disease (men: <55 years; women: <60 years) (ICD-9-CM codes V173, V174) (*1 point*) |
| Clinical history | Premature coronary artery disease (men: <55 years; women: <60 years) (*2 points*), premature cerebrovascular disease (men: <55 years; women: <60 years) (*1 point*) |
| Physical examination | Tendon xanthoma (ICD-9-CM code 272.7) (*6 points*), corneal arch before age 45 (ICD-9-CM 371.41) (*4 points*) |
| LDL-C levels | >325 mg/dL (*8 points*), 251-325 mg/dL (*5 points*), 191-250 mg/dL (*3 points*), 155-190 mg/dL (*1 point*); the real LDL value was recalculated taking into account the possible type of lipid-lowering therapy administered continuously, in relation to the percentage reduction capacity of the LDL values ​​of the single molecule/dosage (see Supplementary Table 3) |
| Molecular genetic testing (DNA analysis) | Outpatient specialist service codes 91.29.3, 91.30.3, 91.29.4, 91.29.5) (*8 points*), excluding patients with tumors (ICD-9-CM codes 140-239, ATC L), delivery ( ICD-9-CM codes 630-679), cystic fibrosis (ICD-9-CM code 277.0), consumption of drugs for the central nervous system (code ATC N) |

**Supplementary Table 3. FH-derived cohorts’ criteria definitions**

| FH cohort | Criteria definition |
| --- | --- |
| CVD | CORONAROPATHY: at least one hospitalization diagnosed with acute myocardial infarction (ICD-9-CM code: 410), acute cardiac ischaemia (ICD-9-CM code: 411), angina pectoris (ICD-9-CM code -9: 413), chronic cardiac ischaemia (ICD-9-CM code: 414 ); CEREBROVASCULAR DISEASE: at least one hospitalization diagnosed with subarachnoid haemorrhage (ICD-9-CM code: 430), intracerebral haemorrhage (ICD-9-CM code: 431-432), ischemic stroke (ICD-9-CM code: 434; 436), transient ischemic attack (ICD-9-CM code: 435), other cerebrovascular diseases (ICD-9-CM code: 433; 437-438); PERIPHERAL VASCULAR DISEASE: at least one hospitalization with diagnosis of atherosclerosis (ICD-9-CM code: 440), other bacterial vascular diseases (ICD-9-CM code: 443); PERCUTANEOUS CORONARY ANGIOPLASTY: at least one hospitalization with diagnosis of percutaneous transluminal coronary angioplasty (ICD-9-CM code: V4582, procedural codes 0066, 3609); CHRONIC KIDNEY INSUFFICIENCY: at least one hospitalization diagnosed with chronic renal insufficiency (ICD-9-CM code: 585). |
| Diabetes Mellitus | at least two prescriptions of antidiabetic drugs (ATC code A10) or hospitalization with a diagnosis of diabetes (ICD-9-CM code 250). |
| Mixed- Dyslipidemia | Patients with at least one hospitalization diagnosed with mixed familial hypercholesterolemia (ICD-9-CM code 272.2) or exemption code 025.272.2 |
| Primary-Prevention | Patients on statin treatment and at least one LDL determination, not included in previous study cohorts. |

**Supplementary Table 4. List of treatments evaluated for nFH and FH patients**

| ATC | Molecule | | mg |
| --- | --- | --- | --- |
| C10AA05 | ATORVASTATIN (HP) | | 40 |
| C10AA05 | ATORVASTATIN (HP) | | 80 |
| C10AA07 | ROSUVASTATIN (HP) | | 20 |
| C10AA07 | ROSUVASTATIN (HP) | | 40 |
| C10BA05 | ATORVASTATIN AND EZETIMIBE (HP) | | 40 |
| C10BA05 | ATORVASTATIN AND EZETIMIBE (HP) | | 80 |
| C10BA06 | ROSUVASTATIN AND EZETIMIBE (HP) | | 20 |
| C10BA06 | ROSUVASTATIN AND EZETIMIBE (HP) | | 40 |
| C10AA01 | SIMVASTATIN | | 10 |
| C10AA01 | SIMVASTATIN | | 20 |
| C10AA01 | SIMVASTATIN | | 40 |
| C10AA01 | SIMVASTATIN | | 80 |
| C10AA02 | LOVASTATIN | | 20 |
| C10AA02 | LOVASTATIN | | 40 |
| C10AA03 | PRAVASTATIN | | 10 |
| C10AA03 | PRAVASTATIN | | 20 |
| C10AA03 | PRAVASTATIN | | 40 |
| C10AA04 | FLUVASTATIN | | 20 |
| C10AA04 | FLUVASTATIN | | 40 |
| C10AA04 | FLUVASTATIN | | 80 |
| C10AA05 | ATORVASTATIN | | 10 |
| C10AA05 | ATORVASTATIN | | 20 |
| C10AA07 | ROSUVASTATIN | | 5 |
| C10AA07 | ROSUVASTATIN | | 10 |
| C10BA02 | SIMVASTATIN AND EZETIMIBE | | 10 |
| C10BA02 | SIMVASTATIN AND EZETIMIBE | | 20 |
| C10BA02 | SIMVASTATIN AND EZETIMIBE | | 40 |
| C10BA02 | SIMVASTATIN AND EZETIMIBE | | 80 |
| C10BA05 | ATORVASTATIN AND EZETIMIBE | | 10 |
| C10BA05 | ATORVASTATIN AND EZETIMIBE | | 20 |
| C10BA06 | ROSUVASTATIN AND EZETIMIBE | | 10 |
| C10AX09 | EZETIMIBE | / | |

HP: high-potency treatment

**Supplementary Table 5. Stratification by age-ranges of FH patients and FH-derived cohorts**

|  | **nFH** | **CVD** | **Diabetes Mellitus** | **Mixed-Dyslipidemia** | **Primary-Prevention** |
| --- | --- | --- | --- | --- | --- |
| N | 164,161 | 46,782 | 34,803 | 1,617 | 80,959 |
| Age 0-39 years (n, %) | 781 (0.5) | 114 (0.2) | 118 (0.3) | 8 (0.5) | 541 (0.7) |
| Age 40-49 years (n, %) | 4,510 (2.7) | 900 (1.9) | 821 (2.4) | 65 (4.0) | 2,724 (3.4) |
| Age 50-59 years (n, %) | 17,201 (10.5) | 3,670 (7.8) | 3,543 (10.2) | 177 (10.9) | 9,811 (12.1) |
| Age 60-69 years (n, %) | 39,205 (23.9) | 8,984 (19.2) | 8,997 (25.9) | 380 (23.5) | 20,844 (25.7) |
| Age 70-79 years (n, %) | 58,885 (35.9) | 16,604 (35.5) | 13,127 (37.7) | 573 (35.4) | 28,581 (35.3) |
| Age 80+ years (n, %) | 43,579 (26.5) | 16,510 (35.3) | 8,197 (23.6) | 414 (25.6) | 18,458 (22.8) |

| **Age-ranges** | **CVD patients (N)** | **CVD patients affected**  **by diabetes N (%)** |
| --- | --- | --- |
| 0-4 | / | / |
| 5-9 | / | / |
| 10-14 | / | / |
| 15-19 | <4 | 0 (0.0) |
| 20-24 | 4 | 0 (0.0) |
| 25-29 | 5 | 0 (0.0) |
| 30-34 | 19 | <4 |
| 35-39 | 85 | 10 (11.8) |
| 40-44 | 238 | 32 (13.4) |
| 45-49 | 662 | 112 (16.9) |
| 50-54 | 1337 | 313 (23.4) |
| 55-59 | 2333 | 673 (28.8) |
| 60-64 | 3592 | 1214 (33.8) |
| 65-69 | 5392 | 2145 (39.8) |
| 70-74 | 7558 | 3124 (41.3) |
| 75-79 | 9046 | 3671 (40.6) |
| 80-84 | 8916 | 3568 (40.0) |
| 85-89 | 5603 | 2057 (36.7) |
| 90-94 | 1772 | 605 (34.1) |
| 95-99 | 215 | 57 (26.5) |
| 100+ | 4 | 4 (100.0) |

**Supplementary Table 6. Stratification by age-ranges of CVD patients affected by diabetes**

**Supplementary Table 7. Stratification by age-ranges of FH patients**

|  | **FH** |
| --- | --- |
| N | 1,287 |
| Age 0-39 years (n, %) | 33 (2.6) |
| Age 40-49 years (n, %) | 101 (7.8) |
| Age 50-59 years (n, %) | 309 (24.0) |
| Age 60-69 years (n, %) | 355 (27.6) |
| Age 70-79 years (n, %) | 365 (28.4) |
| Age 80+ years (n, %) | 124 (9.6) |

**
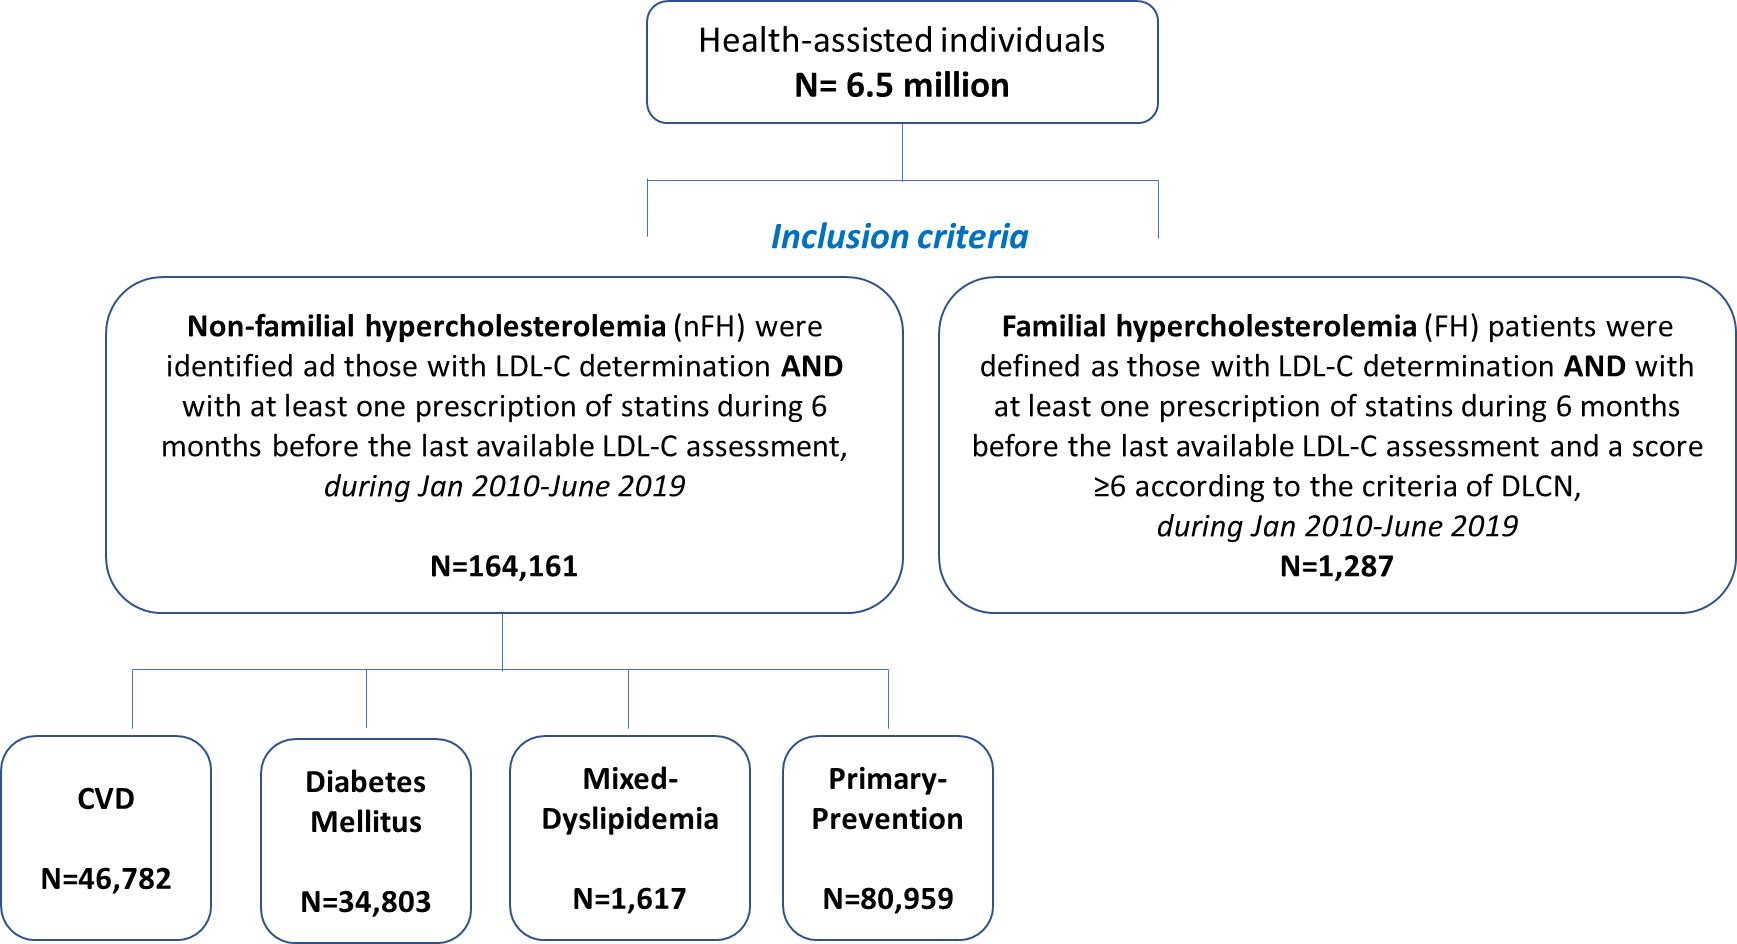
**

**Supplementary Figure.1. Flow-chart for nFH and FH patients indentification and nFH-derived sub-cohorts definition**

**
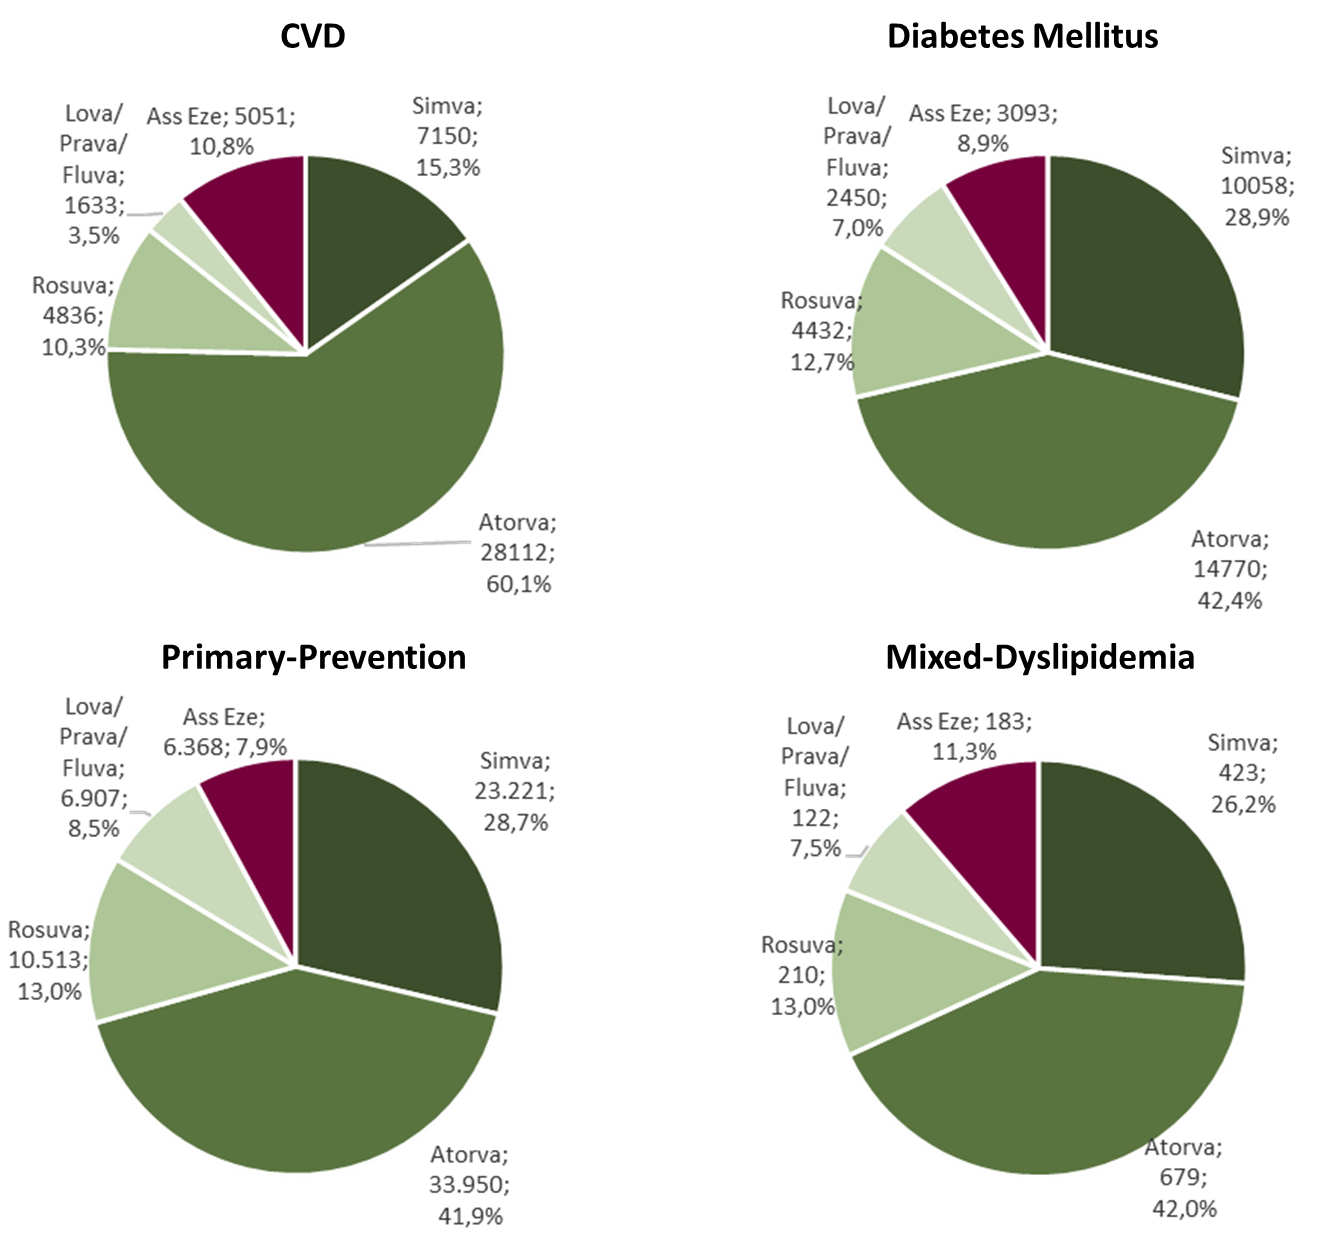
**

**Supplementary Figure 2. Prescription frequency of different statins among nFH-derived cohorts.** At the index-date the identification of therapeutic options prescribed among nFH-derived cohorts was assessed. **Abbreviations:** Atorva, atorvastatin; Simva, simvastatin; Rosuva, rosuvastatin; Lova, lovastatin; Prava, pravastatin; Fluva, fluvastatin; Ass Eze, statin associated with ezetimide or ezetimide alone; nFH, non-familial hypercholesterolemia; CVD, cardiovascular disease cohort; FH, familial hypercholesterolemia.
